# Supplementary material
Source: ML conference proceedings conference paper supplement (https://proceedings.neurips.cc/paper_files/paper/2017/hash/8597a6cfa74defcbde3047c891d78f90-Abstract.html)
Supplement: Supplementary file [file 8597a6cfa74defcbde3047c891d78f90-Supplemental.zip]

# Supplement to “Learned D-AMP: Principled Neural Network based Compressive Image Recovery”

**Christopher A. Metzler**  
Rice University  
chris.metzler@rice.edu

**Ali Mousavi**  
Rice University  
ali.mousavi@rice.edu

**Richard G. Baraniuk**  
Rice University  
richb@rice.edu

Table 1: PSNR of  $128 \times 128$  reconstructions with i.i.d. Gaussian measurements and no measurement noise.

| $\frac{m}{n} = .05$ | Barbara      | Boat         | Fingerprint  | Mandrill     | Peppers      | Couple       | Bridge       |
|---------------------|--------------|--------------|--------------|--------------|--------------|--------------|--------------|
| TVAL3               | 19.32        | 21.05        | 16.49        | 21.98        | 19.36        | 21.09        | 19.22        |
| BM3D-AMP            | 18.04        | 18.92        | 12.25        | 20.79        | 18.28        | 20.38        | 16.77        |
| LDIT                | 17.20        | 19.37        | 16.94        | 20.43        | 17.49        | 19.51        | 18.08        |
| LDAMP               | <b>21.26</b> | <b>22.44</b> | <b>17.04</b> | <b>22.84</b> | <b>21.30</b> | <b>22.74</b> | <b>20.17</b> |
| NLR-CS              | 20.31        | 21.51        | 14.96        | 22.05        | 19.69        | 21.55        | 19.22        |
| $\frac{m}{n} = .10$ | Barbara      | Boat         | Fingerprint  | Mandrill     | Peppers      | Couple       | Bridge       |
| TVAL3               | 21.75        | 22.95        | 16.77        | 23.21        | 21.98        | 23.07        | 20.86        |
| BM3D-AMP            | 24.36        | 24.04        | <b>18.07</b> | 24.12        | 24.44        | 24.79        | 22.05        |
| LDIT                | 19.39        | 21.49        | 17.23        | 22.17        | 19.13        | 21.24        | 19.82        |
| LDAMP               | <b>25.80</b> | <b>24.67</b> | 17.36        | <b>24.37</b> | <b>26.00</b> | <b>25.43</b> | <b>22.52</b> |
| NLR-CS              | 25.17        | 23.84        | 17.84        | 23.56        | 25.18        | 24.91        | 21.80        |
| $\frac{m}{n} = .15$ | Barbara      | Boat         | Fingerprint  | Mandrill     | Peppers      | Couple       | Bridge       |
| TVAL3               | 23.47        | 24.25        | 16.97        | 24.09        | 24.18        | 24.74        | 22.00        |
| BM3D-AMP            | 27.35        | 25.67        | 19.94        | 25.02        | 27.37        | 26.96        | 23.35        |
| LDIT                | 20.53        | 22.54        | 17.29        | 23.17        | 19.74        | 21.89        | 19.50        |
| LDAMP               | <b>28.78</b> | <b>26.79</b> | 17.65        | <b>25.40</b> | <b>29.38</b> | <b>27.65</b> | <b>23.97</b> |
| NLR-CS              | 28.10        | 25.57        | <b>20.11</b> | 24.45        | 28.06        | 26.82        | 23.10        |
| $\frac{m}{n} = .20$ | Barbara      | Boat         | Fingerprint  | Mandrill     | Peppers      | Couple       | Bridge       |
| TVAL3               | 25.20        | 25.47        | 17.32        | 24.84        | 25.90        | 26.17        | 23.08        |
| BM3D-AMP            | 29.57        | 27.40        | 21.19        | 25.80        | 29.55        | 28.55        | 24.45        |
| LDIT                | 20.42        | 22.50        | 17.34        | 22.66        | 21.45        | 22.29        | 20.95        |
| LDAMP               | <b>31.10</b> | <b>28.58</b> | 18.07        | <b>26.31</b> | <b>31.88</b> | <b>29.57</b> | <b>25.21</b> |
| NLR-CS              | 30.42        | 27.34        | <b>21.29</b> | 25.56        | 30.47        | 28.54        | 24.18        |
| $\frac{m}{n} = .25$ | Barbara      | Boat         | Fingerprint  | Mandrill     | Peppers      | Couple       | Bridge       |
| TVAL3               | 26.57        | 26.53        | 17.62        | 25.46        | 27.49        | 27.44        | 23.98        |
| BM3D-AMP            | 31.39        | 28.89        | 21.97        | 26.50        | 31.27        | 30.01        | 25.37        |
| LDIT                | 21.59        | 23.02        | 17.57        | 23.61        | 21.65        | 23.22        | 21.04        |
| LDAMP               | <b>32.68</b> | <b>30.17</b> | 18.13        | <b>27.06</b> | <b>33.87</b> | <b>31.06</b> | <b>26.20</b> |
| NLR-CS              | 32.42        | 28.78        | <b>22.04</b> | 26.52        | 32.47        | 30.13        | 25.26        |

Table 2: PSNR of  $128 \times 128$  reconstructions with coded diffraction measurements and no measurement noise.

| $\frac{m}{n} = .05$ | Barbara      | Boat         | Fingerprint  | Mandrill     | Peppers      | Couple       | Bridge       |
|---------------------|--------------|--------------|--------------|--------------|--------------|--------------|--------------|
| TVAL3               | 21.66        | 22.70        | 16.79        | 23.20        | 21.94        | 22.98        | 20.92        |
| BM3D-AMP            | 18.37        | 17.89        | 13.46        | 13.32        | 17.80        | 16.91        | 20.83        |
| LDIT                | 20.20        | 21.09        | 16.69        | 22.31        | 19.07        | 20.85        | 19.98        |
| LDAMP               | <b>22.10</b> | <b>23.45</b> | <b>17.33</b> | <b>23.54</b> | <b>22.32</b> | <b>23.50</b> | <b>20.94</b> |
| NLR-CS              | 15.14        | 13.44        | 11.73        | 18.43        | 17.23        | 17.70        | 16.04        |
| $\frac{m}{n} = .10$ | Barbara      | Boat         | Fingerprint  | Mandrill     | Peppers      | Couple       | Bridge       |
| TVAL3               | 25.08        | 25.39        | 17.34        | 24.79        | 25.83        | 26.13        | 23.13        |
| BM3D-AMP            | 25.40        | 24.48        | <b>18.68</b> | 24.48        | 25.52        | 25.53        | 22.56        |
| LDIT                | 24.02        | 24.77        | 17.31        | 24.74        | 24.36        | 25.24        | 20.21        |
| LDAMP               | <b>27.90</b> | <b>26.50</b> | 17.56        | <b>25.57</b> | <b>28.18</b> | <b>27.24</b> | <b>23.87</b> |
| NLR-CS              | 24.12        | 21.56        | 17.11        | 21.15        | 24.05        | 22.27        | 21.04        |
| $\frac{m}{n} = .15$ | Barbara      | Boat         | Fingerprint  | Mandrill     | Peppers      | Couple       | Bridge       |
| TVAL3               | 27.78        | 27.71        | 17.96        | 26.05        | 28.90        | 28.54        | 24.90        |
| BM3D-AMP            | 28.96        | 25.98        | <b>20.39</b> | 25.12        | 28.67        | 27.11        | 23.63        |
| LDIT                | 28.44        | 26.59        | 17.31        | 25.73        | 30.21        | 26.92        | 24.28        |
| LDAMP               | <b>30.85</b> | <b>28.79</b> | 17.86        | <b>26.68</b> | <b>32.07</b> | <b>29.54</b> | <b>25.69</b> |
| NLR-CS              | 27.35        | 24.16        | 18.99        | 23.28        | 21.24        | 24.23        | 20.58        |
| $\frac{m}{n} = .20$ | Barbara      | Boat         | Fingerprint  | Mandrill     | Peppers      | Couple       | Bridge       |
| TVAL3               | 30.05        | 29.93        | 18.73        | 27.32        | 31.62        | 30.77        | 26.55        |
| BM3D-AMP            | 32.08        | 28.07        | <b>21.41</b> | 25.89        | 31.47        | 28.99        | 24.57        |
| LDIT                | 31.60        | 28.61        | 17.30        | 26.06        | 32.15        | 30.49        | 25.57        |
| LDAMP               | <b>33.10</b> | <b>30.20</b> | 17.94        | <b>27.59</b> | <b>34.06</b> | <b>32.17</b> | <b>27.24</b> |
| NLR-CS              | 26.41        | 25.26        | 21.04        | 23.48        | 28.18        | 27.67        | 23.47        |
| $\frac{m}{n} = .25$ | Barbara      | Boat         | Fingerprint  | Mandrill     | Peppers      | Couple       | Bridge       |
| TVAL3               | 32.37        | 32.13        | 19.63        | 28.63        | 34.20        | 33.05        | 28.12        |
| BM3D-AMP            | <b>34.69</b> | 29.59        | <b>22.26</b> | 26.36        | 34.74        | 30.51        | 25.69        |
| LDIT                | 34.00        | 30.43        | 17.65        | 26.24        | 35.37        | 31.02        | 27.63        |
| LDAMP               | 34.58        | <b>32.62</b> | 18.60        | <b>29.01</b> | <b>36.07</b> | <b>33.86</b> | <b>28.60</b> |
| NLR-CS              | 31.74        | 28.16        | 20.64        | 25.79        | 28.60        | 28.89        | 21.04        |

Table 3: PSNR of reconstruction of  $128 \times 128$  Boat test image with additive white Gaussian measurement noise (AWGN) with various standard deviations (s.d.).

| AWGN with s.d. 10 |                     |                     |                     |                     |                     |
|-------------------|---------------------|---------------------|---------------------|---------------------|---------------------|
| Sampling rate     | $\frac{m}{n} = .05$ | $\frac{m}{n} = .05$ | $\frac{m}{n} = .05$ | $\frac{m}{n} = .05$ | $\frac{m}{n} = .05$ |
| TVAL3             | 21.08               | 22.84               | 24.06               | 24.97               | 25.75               |
| BM3D-AMP          | 16.99               | 23.98               | 25.40               | 26.79               | 27.64               |
| LDAMP             | <b>22.41</b>        | <b>24.56</b>        | <b>26.36</b>        | <b>27.62</b>        | <b>28.56</b>        |
| AWGN with s.d. 20 |                     |                     |                     |                     |                     |
| Sampling Rate     | $\frac{m}{n} = .05$ | $\frac{m}{n} = .05$ | $\frac{m}{n} = .05$ | $\frac{m}{n} = .05$ | $\frac{m}{n} = .05$ |
| TVAL3             | 21.00               | 22.60               | 23.50               | 23.94               | 24.16               |
| BM3D-AMP          | 21.03               | 23.67               | 24.63               | 25.45               | 26.03               |
| LDAMP             | <b>22.33</b>        | <b>24.24</b>        | <b>25.35</b>        | <b>26.33</b>        | <b>26.75</b>        |
| AWGN with s.d. 30 |                     |                     |                     |                     |                     |
| Sampling Rate     | $\frac{m}{n} = .05$ | $\frac{m}{n} = .05$ | $\frac{m}{n} = .05$ | $\frac{m}{n} = .05$ | $\frac{m}{n} = .05$ |
| TVAL3             | 20.90               | 22.23               | 22.74               | 22.74               | 22.57               |
| BM3D-AMP          | 18.43               | 23.34               | 24.09               | 24.46               | 24.80               |
| LDAMP             | <b>22.11</b>        | <b>23.80</b>        | <b>24.55</b>        | <b>25.10</b>        | <b>25.34</b>        |
| AWGN with s.d. 40 |                     |                     |                     |                     |                     |
| Sampling Rate     | $\frac{m}{n} = .05$ | $\frac{m}{n} = .05$ | $\frac{m}{n} = .05$ | $\frac{m}{n} = .05$ | $\frac{m}{n} = .05$ |
| TVAL3             | 20.77               | 21.80               | 21.93               | 21.60               | 21.12               |
| BM3D-AMP          | 19.24               | 23.02               | 23.55               | 23.77               | 23.94               |
| LDAMP             | <b>21.85</b>        | <b>23.41</b>        | <b>23.90</b>        | <b>24.33</b>        | <b>24.50</b>        |
| AWGN with s.d. 50 |                     |                     |                     |                     |                     |
| Sampling Rate     | $\frac{m}{n} = .05$ | $\frac{m}{n} = .05$ | $\frac{m}{n} = .05$ | $\frac{m}{n} = .05$ | $\frac{m}{n} = .05$ |
| TVAL3             | 20.58               | 21.33               | 21.17               | 20.53               | 19.84               |
| BM3D-AMP          | 19.45               | 22.69               | 23.13               | 23.28               | 23.38               |
| LDAMP             | <b>21.58</b>        | <b>22.96</b>        | <b>23.44</b>        | <b>23.65</b>        | <b>23.76</b>        |
